# Supplementary material for: The Prevalence and the Impact of Frailty in Hepato-Biliary Pancreatic Cancers: A Systematic Review and Meta-Analysis
Source: MDPI journal article supplement (doi:10.3390/jcm11041116), 2022-02-20
Supplement: s1 [file s1]

Supplementary Data

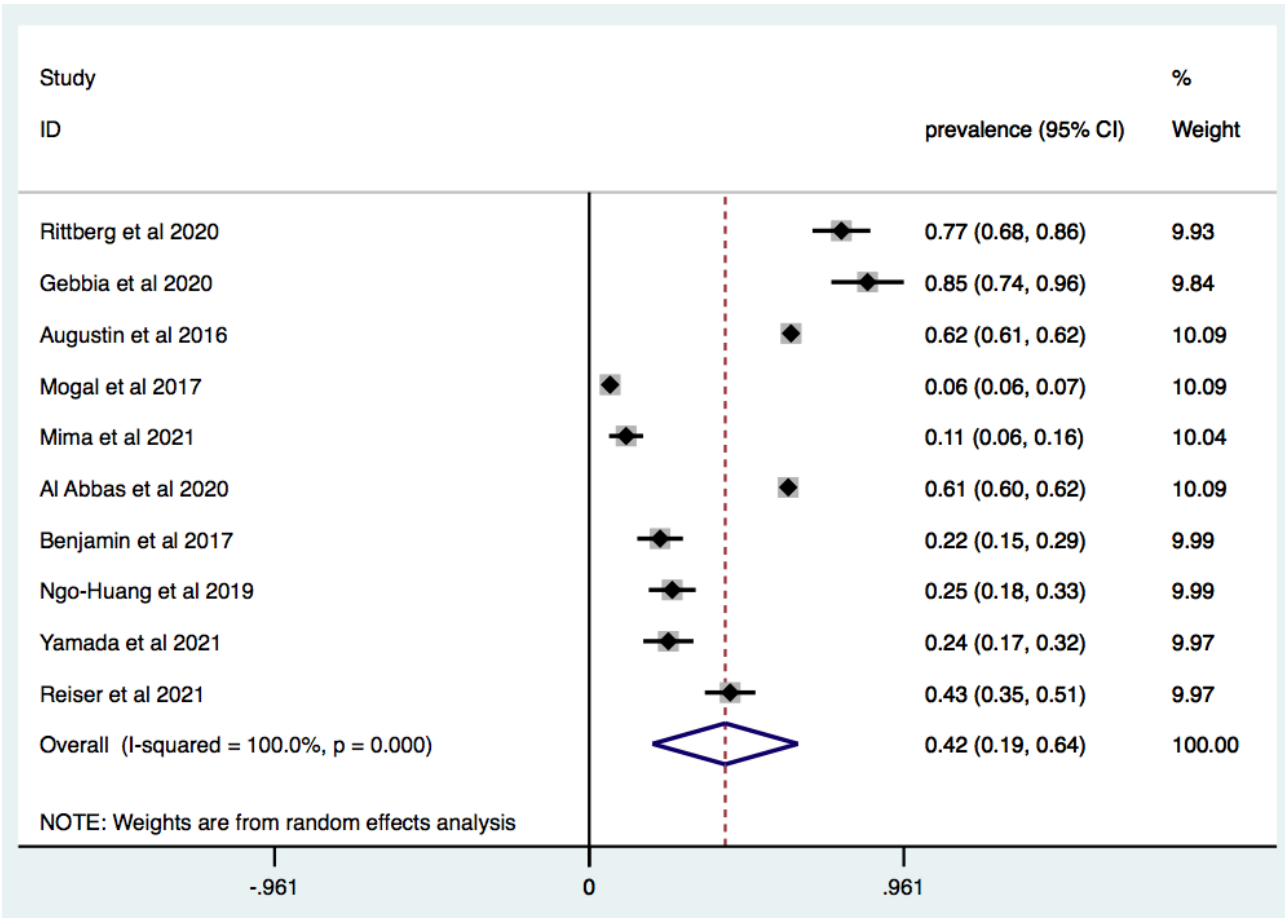

Figure S1. Overall prevalence of frailty in patients with pancreas cancer. Forest plot of cumulative prevalence of frailty in patients with pancreas cancer. Squares are study-specific prevalence. Diamond is the pooled prevalence. Horizontal lines represent 95% Confidence Interval (CI).

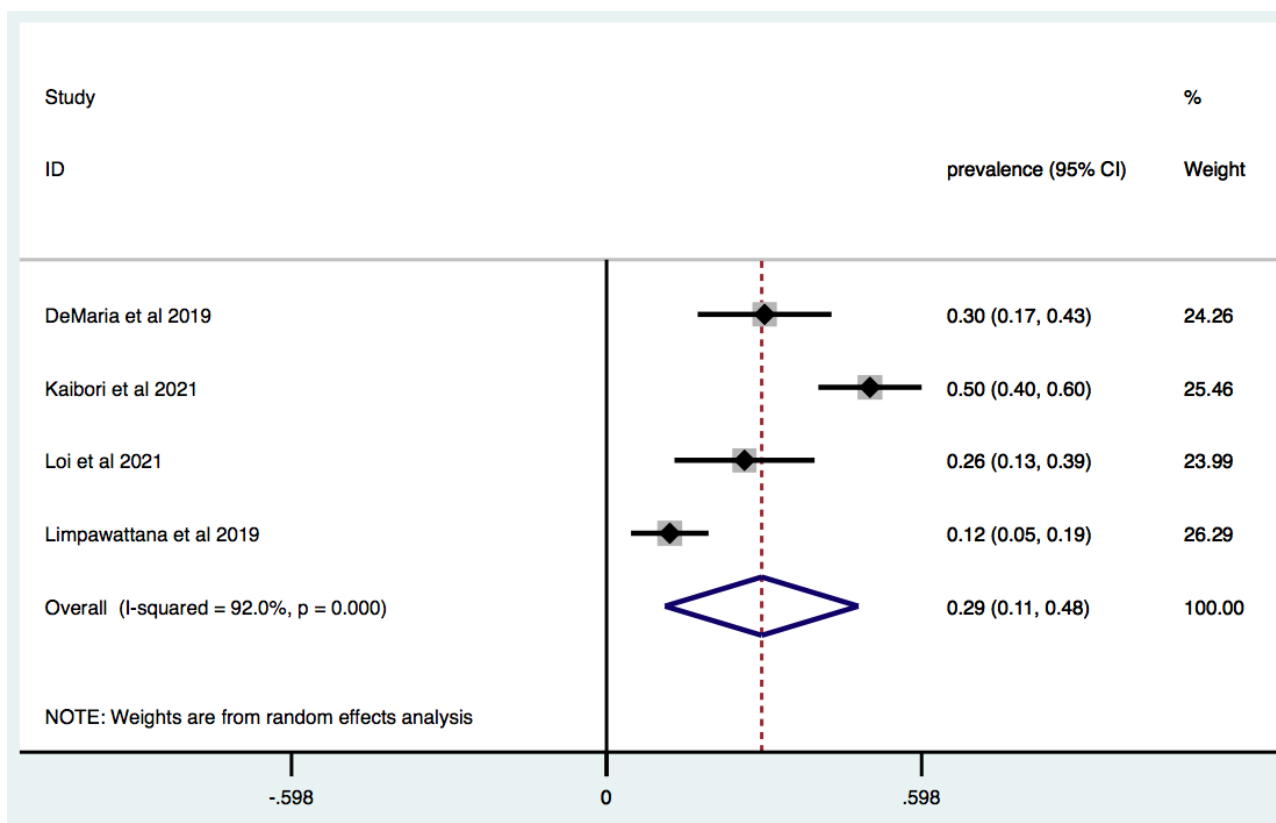

Figure S2. Overall prevalence of frailty in patients with liver cancer. Forest plot of cumulative prevalence of frailty in patients with liver cancer. Squares are study-specific prevalence. Diamond is the pooled prevalence. Horizontal lines represent 95% Confidence Interval (CI).

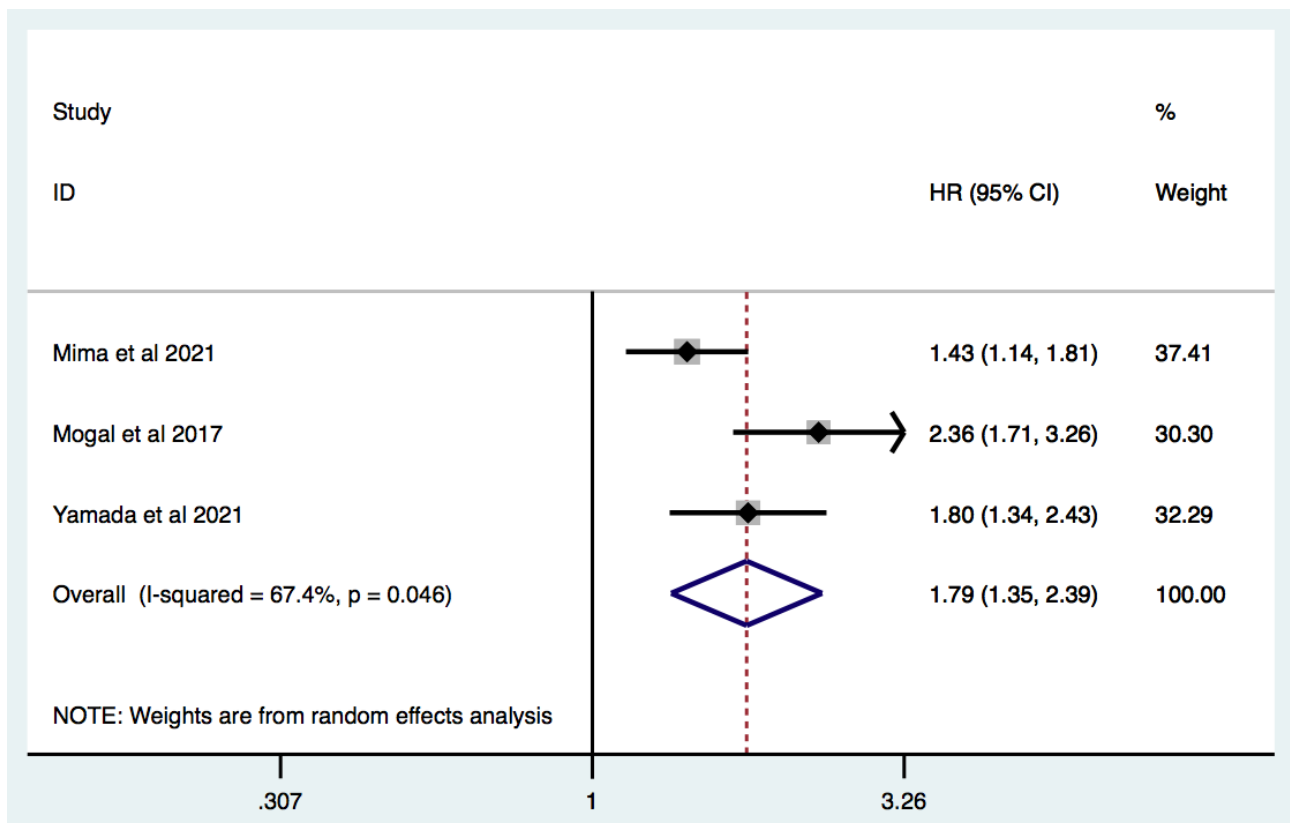

Figure S3: Mortality risk in frail vs non frail patients with HPB cancer where surgery treatment was performed. Squares are study-specific Relative Risk (RR). Diamond is the estimated overall RR. Horizontal lines represent 95% Confidence Interval (CI).

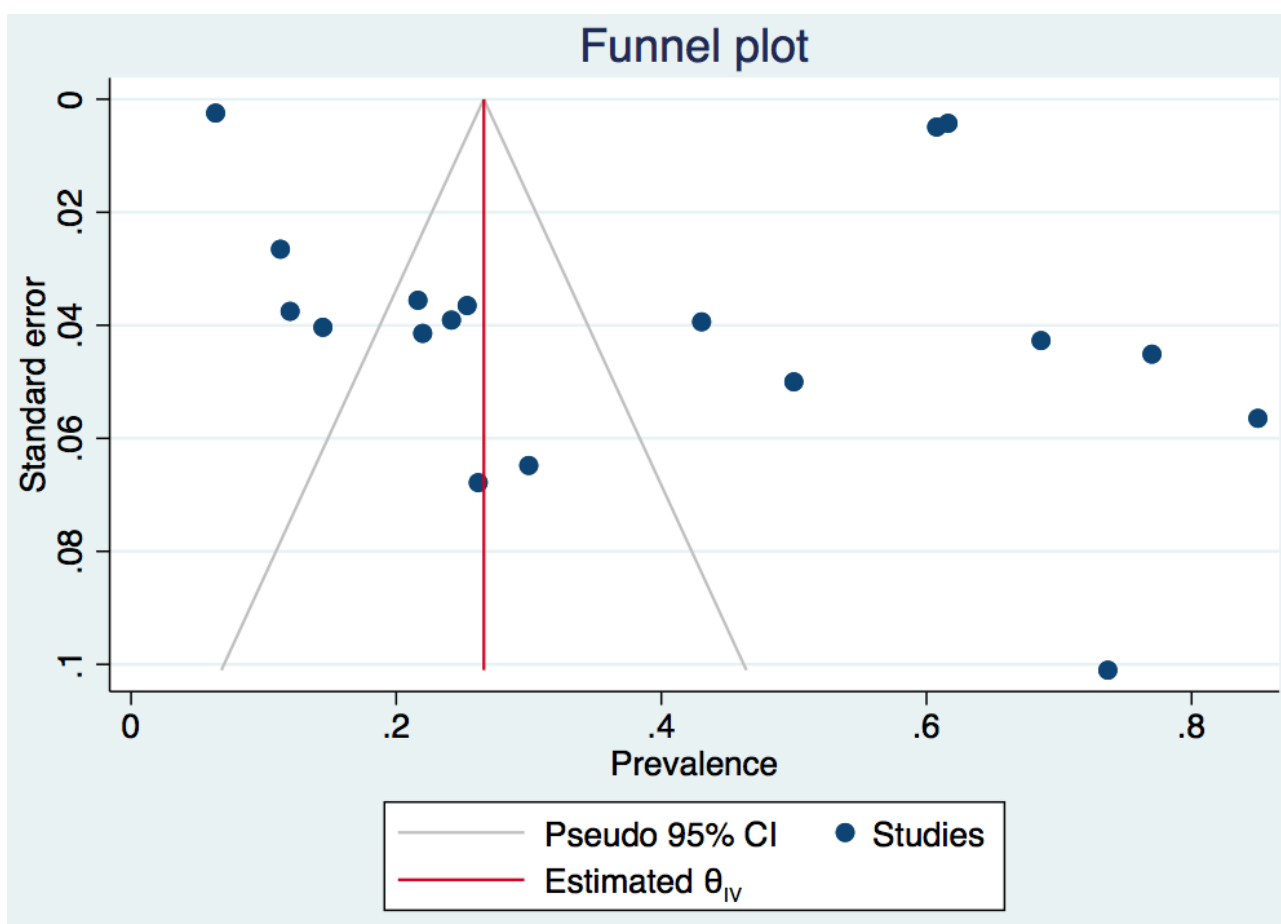

Figure S4: funnel plot of all prevalence studies

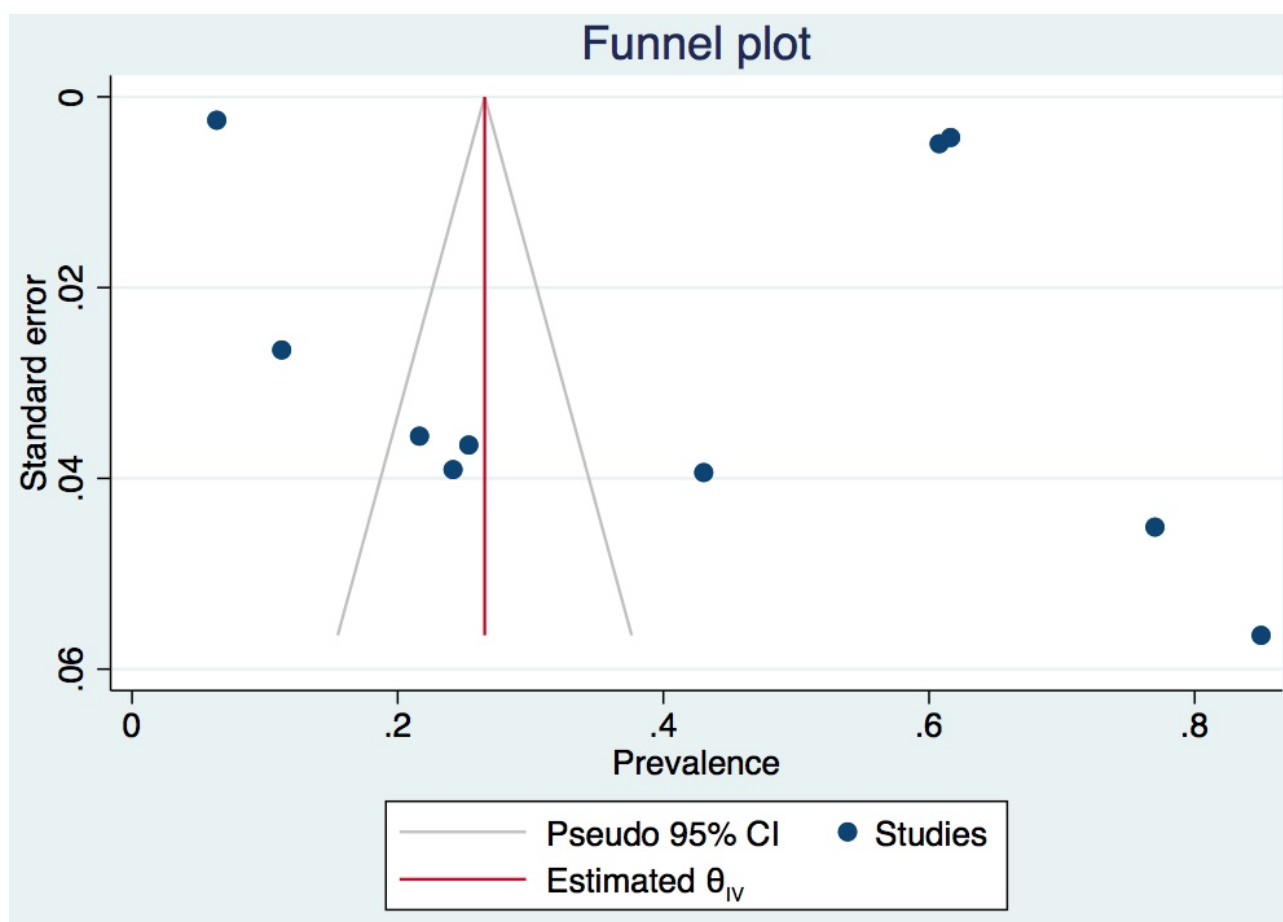

Figure S5: funnel plot of prevalence studies including only pancreas cancer

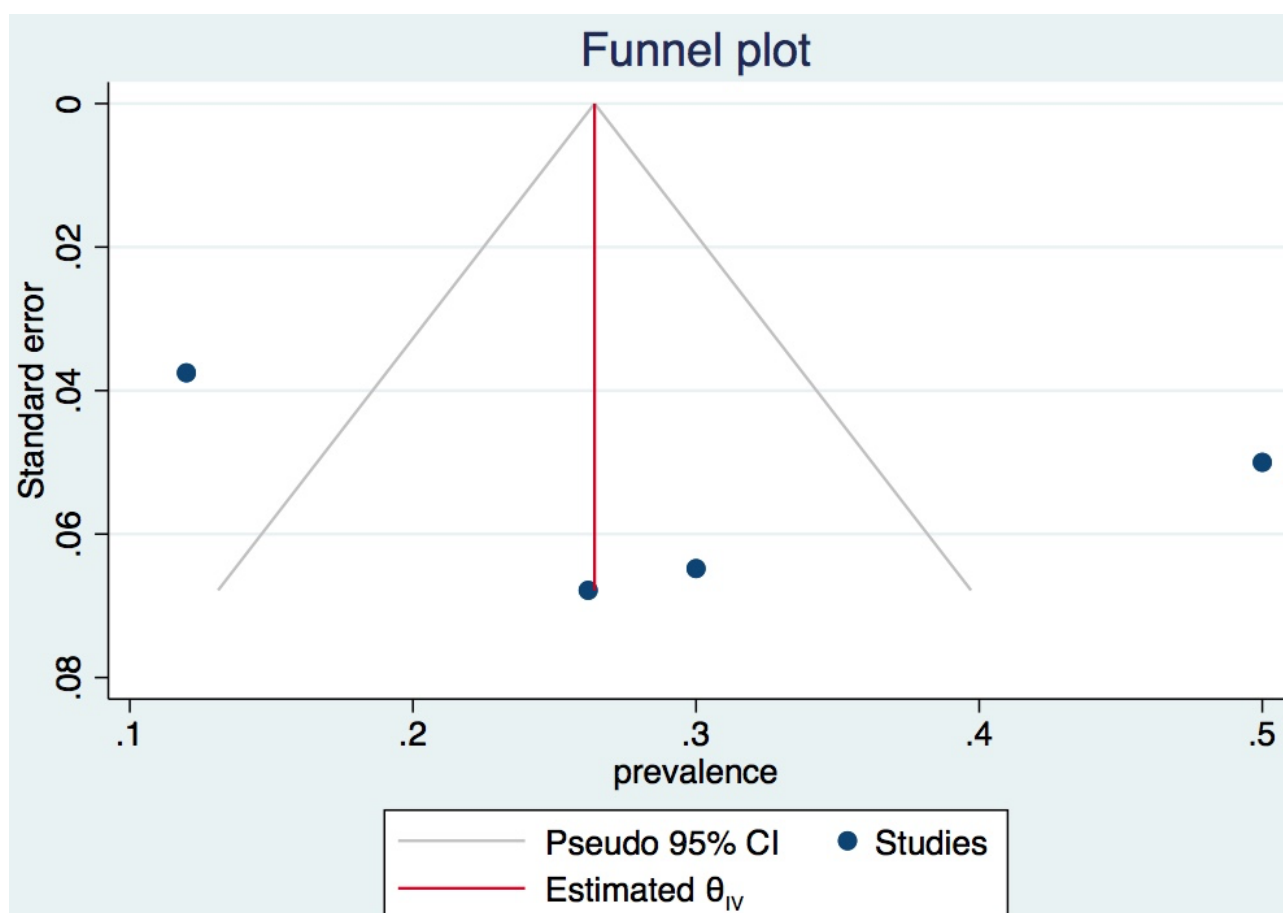

Figure S6: funnel plot of prevalence studies including only liver cancers

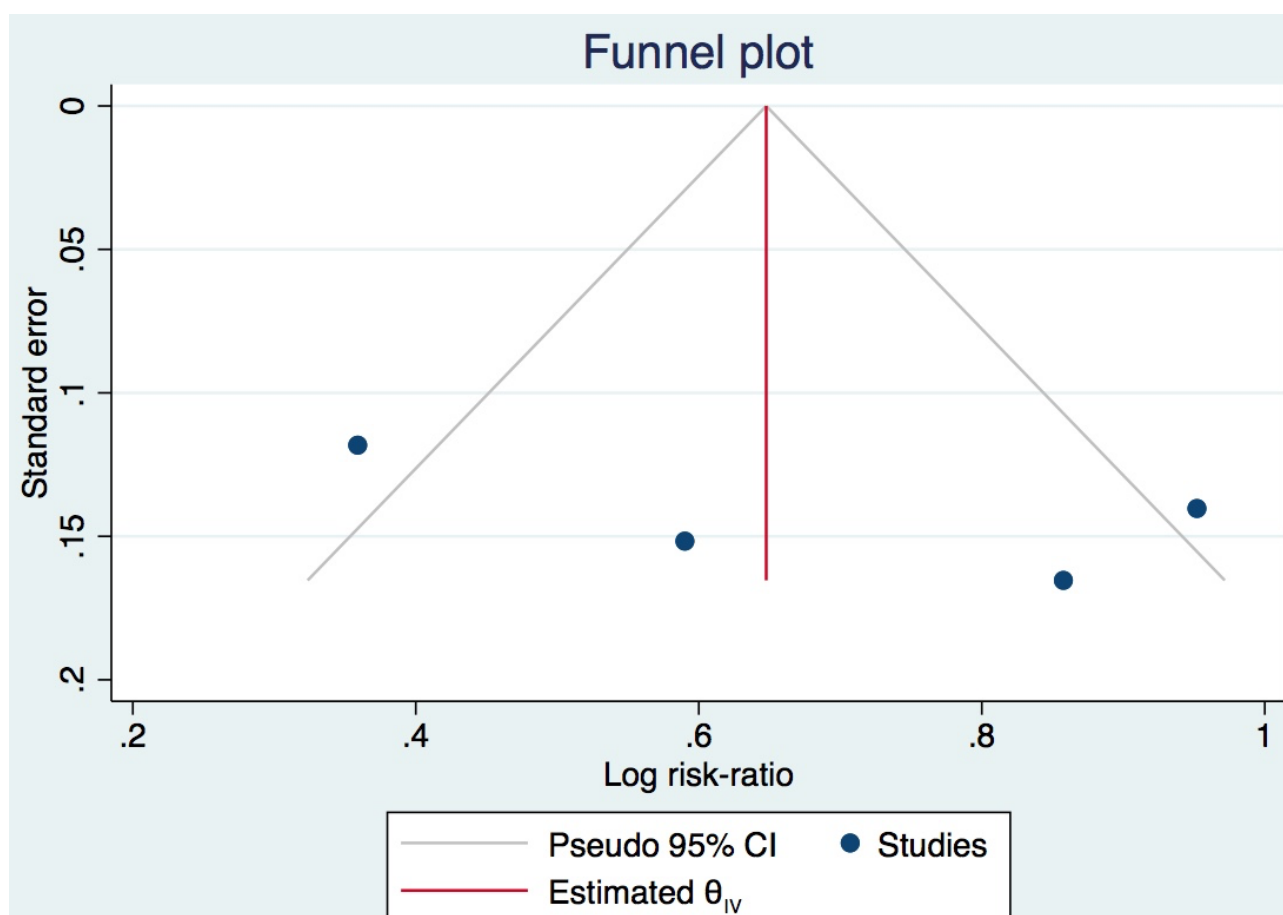

Figure S7: funnel plot of mortality risk

Table S1 . Study Quality.

[illegible]
